# Supplementary material for: Integrated Module and Gene-Specific Regulatory Inference Implicates Upstream Signaling Networks
Source: PubMed Central journal article supplement (PMC3798279; doi:10.1371/journal.pcbi.1003252), 2013-10-17
Supplement: pcbi.1003252.s004.pdf [file pcbi.1003252.s004.pdf]

Figure S4

LOW MODULARITY

|            | p=1   | p=5   | p=10  | p=15  | p=20  |            | p=1   | p=5   | p=10  | p=15  | p=20  |            | p=1   | p=5   | p=10  | p=15  | p=20  |            | p=1   | p=5   | p=10  | p=15  | p=20  |            |       |       |       |       |       |
|------------|-------|-------|-------|-------|-------|------------|-------|-------|-------|-------|-------|------------|-------|-------|-------|-------|-------|------------|-------|-------|-------|-------|-------|------------|-------|-------|-------|-------|-------|
| r=2_h=0.2  | 0.447 | 0.390 | 0.254 | 0.191 | 0.150 | r=2_h=0.2  | 0.352 | 0.251 | 0.141 | 0.095 | 0.063 | r=2_h=0.2  | 0.329 | 0.206 | 0.113 | 0.074 | 0.037 | r=2_h=0.2  | 0.298 | 0.169 | 0.093 | 0.058 | 0.033 | r=2_h=0.2  | 0.303 | 0.177 | 0.110 | 0.080 | 0.060 |
| r=2_h=0.3  | 0.439 | 0.387 | 0.254 | 0.191 | 0.150 | r=2_h=0.3  | 0.352 | 0.249 | 0.143 | 0.095 | 0.063 | r=2_h=0.3  | 0.329 | 0.206 | 0.113 | 0.072 | 0.038 | r=2_h=0.3  | 0.298 | 0.169 | 0.093 | 0.058 | 0.032 | r=2_h=0.3  | 0.303 | 0.177 | 0.110 | 0.080 | 0.060 |
| r=2_h=0.4  | 0.434 | 0.387 | 0.254 | 0.191 | 0.150 | r=2_h=0.4  | 0.354 | 0.251 | 0.143 | 0.095 | 0.063 | r=2_h=0.4  | 0.329 | 0.205 | 0.114 | 0.072 | 0.038 | r=2_h=0.4  | 0.298 | 0.169 | 0.093 | 0.058 | 0.032 | r=2_h=0.4  | 0.304 | 0.177 | 0.110 | 0.080 | 0.060 |
| r=2_h=0.5  | 0.437 | 0.386 | 0.254 | 0.191 | 0.150 | r=2_h=0.5  | 0.366 | 0.255 | 0.143 | 0.095 | 0.063 | r=2_h=0.5  | 0.329 | 0.206 | 0.112 | 0.072 | 0.038 | r=2_h=0.5  | 0.297 | 0.170 | 0.093 | 0.058 | 0.032 | r=2_h=0.5  | 0.303 | 0.177 | 0.110 | 0.080 | 0.060 |
| r=2_h=0.6  | 0.430 | 0.386 | 0.262 | 0.191 | 0.150 | r=2_h=0.6  | 0.372 | 0.254 | 0.143 | 0.095 | 0.063 | r=2_h=0.6  | 0.340 | 0.211 | 0.112 | 0.072 | 0.038 | r=2_h=0.6  | 0.302 | 0.171 | 0.093 | 0.058 | 0.032 | r=2_h=0.6  | 0.302 | 0.179 | 0.110 | 0.080 | 0.060 |
| r=2_h=0.7  | 0.366 | 0.384 | 0.280 | 0.191 | 0.150 | r=2_h=0.7  | 0.365 | 0.266 | 0.145 | 0.099 | 0.061 | r=2_h=0.7  | 0.339 | 0.216 | 0.113 | 0.072 | 0.042 | r=2_h=0.7  | 0.299 | 0.174 | 0.093 | 0.060 | 0.032 | r=2_h=0.7  | 0.310 | 0.187 | 0.112 | 0.080 | 0.061 |
| r=2_h=0.8  | 0.356 | 0.420 | 0.291 | 0.190 | 0.150 | r=2_h=0.8  | 0.302 | 0.312 | 0.173 | 0.106 | 0.061 | r=2_h=0.8  | 0.285 | 0.257 | 0.128 | 0.076 | 0.043 | r=2_h=0.8  | 0.256 | 0.206 | 0.112 | 0.063 | 0.033 | r=2_h=0.8  | 0.260 | 0.218 | 0.132 | 0.088 | 0.064 |
| r=4_h=0.2  | 0.447 | 0.383 | 0.254 | 0.190 | 0.150 | r=4_h=0.2  | 0.351 | 0.250 | 0.143 | 0.095 | 0.065 | r=4_h=0.2  | 0.329 | 0.206 | 0.117 | 0.073 | 0.038 | r=4_h=0.2  | 0.298 | 0.168 | 0.093 | 0.060 | 0.034 | r=4_h=0.2  | 0.303 | 0.178 | 0.111 | 0.081 | 0.061 |
| r=4_h=0.3  | 0.446 | 0.380 | 0.254 | 0.190 | 0.150 | r=4_h=0.3  | 0.352 | 0.250 | 0.146 | 0.092 | 0.065 | r=4_h=0.3  | 0.331 | 0.203 | 0.115 | 0.072 | 0.040 | r=4_h=0.3  | 0.297 | 0.168 | 0.093 | 0.060 | 0.034 | r=4_h=0.3  | 0.303 | 0.178 | 0.110 | 0.081 | 0.061 |
| r=4_h=0.4  | 0.456 | 0.381 | 0.254 | 0.190 | 0.150 | r=4_h=0.4  | 0.360 | 0.252 | 0.145 | 0.095 | 0.065 | r=4_h=0.4  | 0.331 | 0.202 | 0.116 | 0.073 | 0.040 | r=4_h=0.4  | 0.297 | 0.168 | 0.093 | 0.060 | 0.034 | r=4_h=0.4  | 0.304 | 0.178 | 0.111 | 0.081 | 0.061 |
| r=4_h=0.5  | 0.440 | 0.386 | 0.254 | 0.190 | 0.150 | r=4_h=0.5  | 0.368 | 0.262 | 0.147 | 0.095 | 0.068 | r=4_h=0.5  | 0.331 | 0.200 | 0.116 | 0.073 | 0.040 | r=4_h=0.5  | 0.298 | 0.170 | 0.094 | 0.060 | 0.034 | r=4_h=0.5  | 0.306 | 0.177 | 0.110 | 0.081 | 0.061 |
| r=4_h=0.6  | 0.424 | 0.387 | 0.276 | 0.190 | 0.158 | r=4_h=0.6  | 0.372 | 0.268 | 0.147 | 0.095 | 0.068 | r=4_h=0.6  | 0.330 | 0.205 | 0.119 | 0.073 | 0.040 | r=4_h=0.6  | 0.290 | 0.171 | 0.095 | 0.060 | 0.034 | r=4_h=0.6  | 0.302 | 0.179 | 0.112 | 0.081 | 0.061 |
| r=4_h=0.7  | 0.350 | 0.422 | 0.270 | 0.197 | 0.158 | r=4_h=0.7  | 0.335 | 0.291 | 0.163 | 0.105 | 0.070 | r=4_h=0.7  | 0.329 | 0.205 | 0.122 | 0.072 | 0.042 | r=4_h=0.7  | 0.299 | 0.176 | 0.101 | 0.062 | 0.034 | r=4_h=0.7  | 0.308 | 0.190 | 0.116 | 0.082 | 0.061 |
| r=4_h=0.8  | 0.355 | 0.400 | 0.309 | 0.187 | 0.158 | r=4_h=0.8  | 0.304 | 0.315 | 0.205 | 0.119 | 0.067 | r=4_h=0.8  | 0.285 | 0.264 | 0.143 | 0.082 | 0.044 | r=4_h=0.8  | 0.254 | 0.199 | 0.128 | 0.074 | 0.037 | r=4_h=0.8  | 0.257 | 0.214 | 0.145 | 0.103 | 0.068 |
| r=8_h=0.2  | 0.435 | 0.381 | 0.263 | 0.190 | 0.150 | r=8_h=0.2  | 0.353 | 0.250 | 0.146 | 0.099 | 0.068 | r=8_h=0.2  | 0.329 | 0.207 | 0.116 | 0.074 | 0.042 | r=8_h=0.2  | 0.298 | 0.168 | 0.093 | 0.060 | 0.035 | r=8_h=0.2  | 0.303 | 0.176 | 0.111 | 0.080 | 0.061 |
| r=8_h=0.3  | 0.456 | 0.375 | 0.263 | 0.190 | 0.150 | r=8_h=0.3  | 0.355 | 0.249 | 0.147 | 0.099 | 0.068 | r=8_h=0.3  | 0.329 | 0.204 | 0.118 | 0.074 | 0.043 | r=8_h=0.3  | 0.298 | 0.168 | 0.093 | 0.061 | 0.035 | r=8_h=0.3  | 0.304 | 0.175 | 0.111 | 0.081 | 0.062 |
| r=8_h=0.4  | 0.483 | 0.386 | 0.263 | 0.190 | 0.150 | r=8_h=0.4  | 0.361 | 0.249 | 0.151 | 0.099 | 0.068 | r=8_h=0.4  | 0.327 | 0.204 | 0.117 | 0.075 | 0.043 | r=8_h=0.4  | 0.299 | 0.169 | 0.094 | 0.061 | 0.035 | r=8_h=0.4  | 0.306 | 0.176 | 0.112 | 0.082 | 0.061 |
| r=8_h=0.5  | 0.408 | 0.391 | 0.270 | 0.190 | 0.150 | r=8_h=0.5  | 0.370 | 0.265 | 0.160 | 0.099 | 0.068 | r=8_h=0.5  | 0.329 | 0.208 | 0.118 | 0.075 | 0.043 | r=8_h=0.5  | 0.293 | 0.169 | 0.094 | 0.061 | 0.035 | r=8_h=0.5  | 0.303 | 0.181 | 0.112 | 0.082 | 0.062 |
| r=8_h=0.6  | 0.414 | 0.399 | 0.290 | 0.205 | 0.167 | r=8_h=0.6  | 0.367 | 0.282 | 0.160 | 0.099 | 0.068 | r=8_h=0.6  | 0.328 | 0.212 | 0.120 | 0.075 | 0.043 | r=8_h=0.6  | 0.288 | 0.167 | 0.096 | 0.061 | 0.035 | r=8_h=0.6  | 0.282 | 0.181 | 0.113 | 0.082 | 0.062 |
| r=8_h=0.7  | 0.338 | 0.377 | 0.316 | 0.201 | 0.164 | r=8_h=0.7  | 0.307 | 0.298 | 0.188 | 0.126 | 0.067 | r=8_h=0.7  | 0.322 | 0.214 | 0.126 | 0.088 | 0.045 | r=8_h=0.7  | 0.282 | 0.176 | 0.104 | 0.068 | 0.037 | r=8_h=0.7  | 0.301 | 0.208 | 0.125 | 0.086 | 0.065 |
| r=8_h=0.8  | 0.357 | 0.353 | 0.348 | 0.214 | 0.163 | r=8_h=0.8  | 0.301 | 0.254 | 0.231 | 0.139 | 0.074 | r=8_h=0.8  | 0.285 | 0.204 | 0.184 | 0.101 | 0.054 | r=8_h=0.8  | 0.252 | 0.162 | 0.161 | 0.082 | 0.045 | r=8_h=0.8  | 0.248 | 0.163 | 0.162 | 0.111 | 0.079 |
| r=10_h=0.2 | 0.436 | 0.394 | 0.263 | 0.189 | 0.150 | r=10_h=0.2 | 0.353 | 0.249 | 0.145 | 0.101 | 0.065 | r=10_h=0.2 | 0.330 | 0.205 | 0.113 | 0.076 | 0.043 | r=10_h=0.2 | 0.298 | 0.167 | 0.094 | 0.060 | 0.035 | r=10_h=0.2 | 0.303 | 0.175 | 0.109 | 0.080 | 0.061 |
| r=10_h=0.3 | 0.453 | 0.388 | 0.263 | 0.189 | 0.150 | r=10_h=0.3 | 0.359 | 0.244 | 0.150 | 0.101 | 0.065 | r=10_h=0.3 | 0.326 | 0.204 | 0.115 | 0.076 | 0.044 | r=10_h=0.3 | 0.297 | 0.167 | 0.094 | 0.060 | 0.035 | r=10_h=0.3 | 0.304 | 0.174 | 0.110 | 0.079 | 0.061 |
| r=10_h=0.4 | 0.455 | 0.381 | 0.263 | 0.189 | 0.150 | r=10_h=0.4 | 0.369 | 0.253 | 0.156 | 0.101 | 0.065 | r=10_h=0.4 | 0.326 | 0.204 | 0.115 | 0.075 | 0.044 | r=10_h=0.4 | 0.297 | 0.170 | 0.095 | 0.060 | 0.035 | r=10_h=0.4 | 0.306 | 0.173 | 0.111 | 0.080 | 0.062 |
| r=10_h=0.5 | 0.434 | 0.394 | 0.270 | 0.189 | 0.150 | r=10_h=0.5 | 0.366 | 0.264 | 0.162 | 0.103 | 0.065 | r=10_h=0.5 | 0.330 | 0.206 | 0.118 | 0.076 | 0.044 | r=10_h=0.5 | 0.296 | 0.170 | 0.096 | 0.060 | 0.035 | r=10_h=0.5 | 0.303 | 0.181 | 0.114 | 0.082 | 0.062 |
| r=10_h=0.6 | 0.424 | 0.375 | 0.290 | 0.204 | 0.174 | r=10_h=0.6 | 0.367 | 0.277 | 0.159 | 0.103 | 0.065 | r=10_h=0.6 | 0.322 | 0.211 | 0.119 | 0.078 | 0.045 | r=10_h=0.6 | 0.284 | 0.172 | 0.097 | 0.060 | 0.035 | r=10_h=0.6 | 0.276 | 0.180 | 0.116 | 0.082 | 0.062 |
| r=10_h=0.7 | 0.345 | 0.371 | 0.305 | 0.197 | 0.176 | r=10_h=0.7 | 0.294 | 0.291 | 0.186 | 0.120 | 0.076 | r=10_h=0.7 | 0.306 | 0.214 | 0.129 | 0.084 | 0.048 | r=10_h=0.7 | 0.278 | 0.175 | 0.104 | 0.069 | 0.043 | r=10_h=0.7 | 0.301 | 0.202 | 0.131 | 0.092 | 0.067 |
| r=10_h=0.8 | 0.363 | 0.371 | 0.340 | 0.225 | 0.173 | r=10_h=0.8 | 0.304 | 0.253 | 0.210 | 0.147 | 0.077 | r=10_h=0.8 | 0.282 | 0.202 | 0.154 | 0.121 | 0.055 | r=10_h=0.8 | 0.249 | 0.161 | 0.129 | 0.098 | 0.051 | r=10_h=0.8 | 0.247 | 0.157 | 0.140 | 0.119 | 0.082 |
| r=12_h=0.2 | 0.437 | 0.401 | 0.263 | 0.181 | 0.150 | r=12_h=0.2 | 0.352 | 0.249 | 0.148 | 0.101 | 0.068 | r=12_h=0.2 | 0.330 | 0.204 | 0.118 | 0.076 | 0.045 | r=12_h=0.2 | 0.298 | 0.168 | 0.096 | 0.060 | 0.036 | r=12_h=0.2 | 0.304 | 0.175 | 0.110 | 0.079 | 0.062 |
| r=12_h=0.3 | 0.460 | 0.381 | 0.263 | 0.181 | 0.150 | r=12_h=0.3 | 0.361 | 0.241 | 0.152 | 0.101 | 0.067 | r=12_h=0.3 | 0.326 | 0.201 | 0.117 | 0.075 | 0.045 | r=12_h=0.3 | 0.296 | 0.167 | 0.097 | 0.061 | 0.036 | r=12_h=0.3 | 0.305 | 0.173 | 0.109 | 0.079 | 0.062 |
| r=12_h=0.4 | 0.462 | 0.371 | 0.263 | 0.181 | 0.150 | r=12_h=0.4 | 0.371 | 0.254 | 0.156 | 0.101 | 0.068 | r=12_h=0.4 | 0.326 | 0.203 | 0.114 | 0.074 | 0.045 | r=12_h=0.4 | 0.295 | 0.169 | 0.099 | 0.061 | 0.036 | r=12_h=0.4 | 0.307 | 0.174 | 0.112 | 0.082 | 0.063 |
| r=12_h=0.5 | 0.413 | 0.381 | 0.270 | 0.181 | 0.150 | r=12_h=0.5 | 0.371 | 0.274 | 0.161 | 0.103 | 0.068 | r=12_h=0.5 | 0.329 | 0.207 | 0.114 | 0.075 | 0.045 | r=12_h=0.5 | 0.293 | 0.170 | 0.098 | 0.061 | 0.036 | r=12_h=0.5 | 0.298 | 0.178 | 0.117 | 0.083 | 0.063 |
| r=12_h=0.6 | 0.428 | 0.376 | 0.283 | 0.204 | 0.182 | r=12_h=0.6 | 0.369 | 0.280 | 0.161 | 0.103 | 0.068 | r=12_h=0.6 | 0.324 | 0.207 | 0.116 | 0.078 | 0.046 | r=12_h=0.6 | 0.273 | 0.169 | 0.101 | 0.061 | 0.036 | r=12_h=0.6 | 0.272 | 0.183 | 0.118 | 0.084 | 0.063 |
| r=12_h=0.7 | 0.345 | 0.383 | 0.300 | 0.197 | 0.172 | r=12_h=0.7 | 0.295 | 0.278 | 0.183 | 0.118 | 0.081 | r=12_h=0.7 | 0.296 | 0.218 | 0.128 | 0.089 | 0.052 | r=12_h=0.7 | 0.282 | 0.175 | 0.111 | 0.072 | 0.046 | r=12_h=0.7 | 0.289 | 0.207 | 0.138 | 0.091 | 0.069 |
| r=12_h=0.8 | 0.355 | 0.362 | 0.302 | 0.218 | 0.173 | r=12_h=0.8 | 0.298 | 0.252 | 0.186 | 0.178 | 0.086 | r=12_h=0.8 | 0.284 | 0.202 | 0.141 | 0.142 | 0.069 | r=12_h=0.8 | 0.250 | 0.160 | 0.118 | 0.120 | 0.053 | r=12_h=0.8 | 0.243 | 0.159 | 0.121 | 0.130 | 0.083 |
| r=14_h=0.2 | 0.433 | 0.394 | 0.270 | 0.181 | 0.150 | r=14_h=0.2 | 0.353 | 0.245 | 0.148 | 0.099 | 0.068 | r=14_h=0.2 | 0.330 | 0.201 | 0.115 | 0.077 | 0.047 | r=14_h=0.2 | 0.298 | 0.167 | 0.096 | 0.061 | 0.037 | r=14_h=0.2 | 0.304 | 0.175 | 0.108 | 0.080 | 0.062 |
| r=14_h=0.3 | 0.458 | 0.381 | 0.270 | 0.180 | 0.150 | r=14_h=0.3 | 0.359 | 0.240 | 0.152 | 0.099 | 0.070 | r=14_h=0.3 | 0.325 | 0.200 | 0.116 | 0.077 | 0.047 | r=14_h=0.3 | 0.297 | 0.167 | 0.098 | 0.061 | 0.037 | r=14_h=0.3 | 0.305 | 0.173 | 0.109 | 0.080 | 0.061 |
| r=14_h=0.4 | 0.461 | 0.380 | 0.263 | 0.180 | 0.150 |            |       |       |       |       |       |            |       |       |       |       |       |            |       |       |       |       |       |            |       |       |       |       |       |
