# Supplementary material for: Integrated Module and Gene-Specific Regulatory Inference Implicates Upstream Signaling Networks
Source: PubMed Central journal article supplement (PMC3798279; doi:10.1371/journal.pcbi.1003252), 2013-10-17

Figure S5

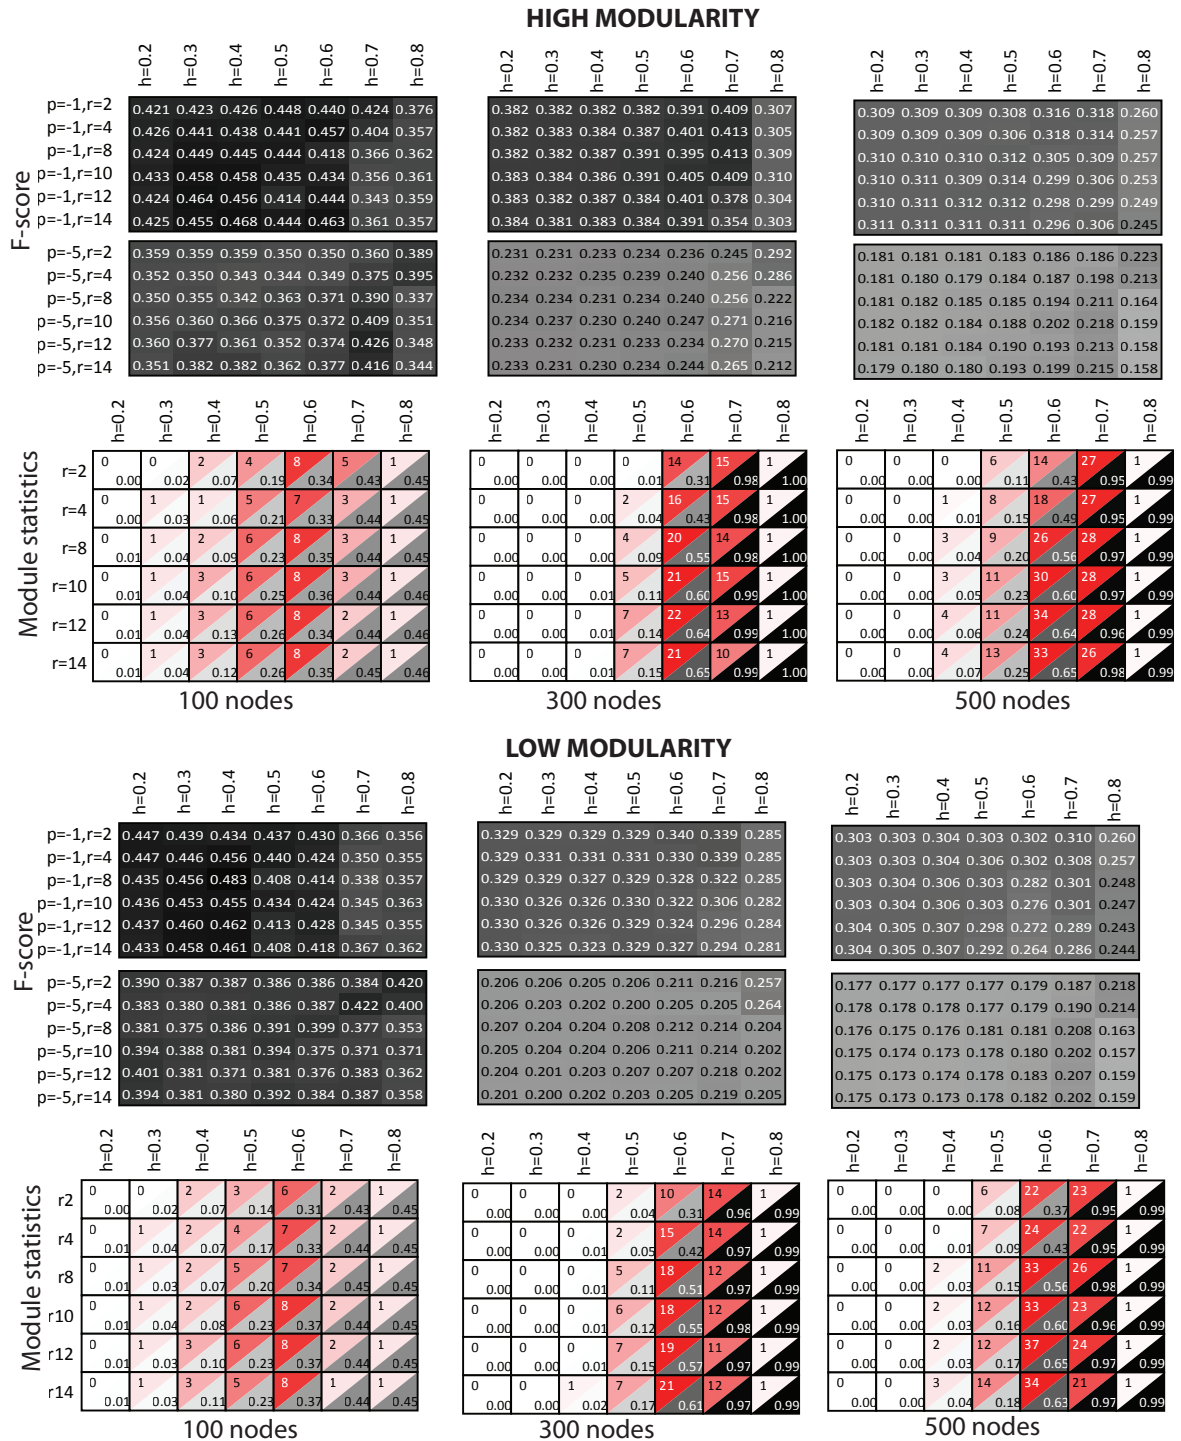

Supplement: pcbi.1003252.s005.pdf [file pcbi.1003252.s005.pdf]
