# Supplementary material for: Integrated Module and Gene-Specific Regulatory Inference Implicates Upstream Signaling Networks
Source: PubMed Central journal article supplement (PMC3798279; doi:10.1371/journal.pcbi.1003252), 2013-10-17
Supplement: pcbi.1003252.s010.pdf [file pcbi.1003252.s010.pdf]

## Pseudo code and additional details of the MERLIN algorithm

As described in the text the MERLIN algorithm is an iterative algorithm that infers module-constrained per-gene regulatory networks. Here we describe the pseudo code for the MERLIN algorithm. There are two phases in the network inference: learning the regulators per gene (**Steps 7-13**) given the current module membership, and updating the module membership given the current regulator network (**Steps 15-18**). The algorithm starts with an empty regulator set  $\mathbf{R}_i$  for each gene  $X_i$ . During the regulator identification steps (**Step 6-11**), it updates the  $\mathbf{R}_i$  by identifying the next best regulator that improves the score of a gene  $X_i$ . It repeats this procedure for each target gene either until there is no more score improvement for  $X_i$  or a fixed number of steps have been executed. While it is adding regulators to a gene, it also updates the regulator-module relationship, which influences which regulators get selected for subsequent genes.

Once the regulator sets of all variables have been examined, we update the module memberships (**Steps 13-16**). This is done efficiently by making use of a min-heap data structure. We also do not merge any nodes that have a greater than the specified threshold of clustering. When we merge two nodes,  $k$  and  $l$  in the hierarchy we use average linkage to define the distance of the new node,  $m$  from all other nodes,  $n$  (**Step 15-16**). This step defines our modules. Next using these modules we update the regulators associated with each gene to see if adding more regulators helps improve the score associated with a gene.

---

### Algorithm 1 Learning in MERLIN

---

```
1: Input:  
   Initial module assignment for each gene,  $\mathbf{M}_{init}$   
   Dataset  $\mathcal{D}$   
   Candidate regulators  $\mathcal{R}$   
   Sparsity:  $p$ , Module prior:  $r$ , Minimum similarity between two modules:  $h$   
2: Output:  
   Inferred module for each gene,  $\mathbf{M}_{final}$   
   Regulatory network, specifying the set of regulators,  $\mathbf{R}$  per gene as well as  
   their parameters,  $\theta_i$   
3:  $\mathbf{M}_{curr} = \mathbf{M}_{init}$   
4:  $\mathbf{R}_i = \emptyset, \forall i$  /*Initialize regulators for each gene*/  
5: while not converged do  
6:   /*Update regulators  $\mathbf{R}_i \forall X_i$  given  $\mathbf{M}_{curr}$ .*/  
7:   for  $X_i \in \mathbf{X}$  do  
8:     repeat  
9:        $X_k = \arg \max_{X_j \in \mathcal{R} \setminus \mathbf{R}_i} S(X_i; \mathbf{R}_i \cup X_j) - S(X_i; \mathbf{R}_i)$   
10:       $\mathbf{R}_i = \mathbf{R}_i \cup \{X_k\}$ .  
11:      Add  $X_k$  to  $X_i$ 's module,  $M_i$ .  
12:     until A fixed number of iterations or until adding regulators does not improve  
        $X_i$ 's score  
13:   end for  
14:   /*Hierarchically cluster genes using co-expression and co-regulator for pairs  
     of genes to obtain new  $\mathbf{M}_{curr}$ */.  
15:   while There exists a node pair  $k$  and  $l$  such that  $dist(k, l) \leq h$  do  
16:     Merge  $k, l$  into new node  $m$ .  
17:     Compute distance  $dist(m, n)$  for all nodes other than  $k$  and  $l$  and insert pair  
     into min heap.  
18:   end while  
19: end while  
20:  $\mathbf{M}_{final} = \mathbf{M}_{curr}$ 
```

---

## Parameter estimation in MERLIN

To compute the score  $S(X_i, \mathbf{R}_i)$  for each gene,  $X_i$  and its regulators  $\mathbf{R}_i$ , we assume that  $X_i$  and  $\mathbf{R}_i$  are distributed according to a  $|\mathbf{R}_i| + 1$ -dimensional multi-variate Gaussian, with mean  $\mathbf{m}_i$ , a  $|\mathbf{R}_i| + 1$ -dimensional mean vector, and a  $|\mathbf{R}_i| + 1 \times |\mathbf{R}_i| + 1$ -dimensional co-variance matrix  $\Sigma_i$ . To estimate the conditional probability distributions of a gene's expression level given its regulators' expression level in sample  $d$  we estimate a conditional mean  $\mu_{i|\mathbf{R}_i}$  and conditional variance  $\Sigma_{i|\mathbf{R}_i}$  as follows:

$$\mu_{i|\mathbf{R}_i} = \mu_i + \Sigma_i(i, -i) \text{inv}(\Sigma_i(-i, -i)) (\mathbf{x}_{\mathbf{R}_i}^d - \mathbf{m}_{-i})^\top.$$

$$\sigma_{i|\mathbf{R}_i} = \sigma_{ii} - \Sigma_i(i, -i) \text{inv}(\Sigma_i(-i, -i)) \Sigma_i^\top(i, -i).$$

Here  $\mu_i$  is the mean expression level of gene  $i$ ,  $\sigma_{ii}$  is the variance of  $X_i$ .  $\mathbf{m}_{-i}$  is the mean of all elements in  $\mathbf{R}_i$ , and  $\mathbf{x}_{\mathbf{R}_i}^d$  is the assignment to all elements of  $\mathbf{R}_i$  in the  $d^{\text{th}}$  sample.  $\Sigma_i(-i, -i)$  is the original  $\Sigma_i$  after dropping the row and column corresponding to  $X_i$ .  $\Sigma_i(i, -i)$  is the row in  $\Sigma_i(-i, -i)$  corresponding to  $X_i$ .
